# Supplementary material for: High-throughput screening and Bayesian machine learning for copper-dependent inhibitors of Staphylococcus aureus
Source: Royal Society of Chemistry journal article supplement (doi:10.1039/c8mt00342d), 2019-02-22
Supplement: c8mt00342d3.xlsx [file c8mt00342d3.xlsx]

## Sheet: Table_S1
DATASET S1 717 compounds with confirmed copper-dependent activity as assayed through a 10-step dose response assay. IC50 values are reported in micromolar.
ABID	SMILES	IC50
AB00980214	C1(=C(NC(=S)NC1c1ccc(cc1)OCCCCCC)C)C(=O)OC(C)(C)C	1.421
AB01133592	CCn1c(NC(=O)CCc2onc(n2)c3ccsc3)nc4ccccc14	1.568
AB01002685	CCCn1c(NC(=O)C2(C)CC2(Cl)Cl)nc3ccccc13	1.83
AB01122868	O=C(COC(=O)c1cc2CCCCc2s1)Nc3oc(nn3)c4ccccc4	1.969
AB00985574	c1(c(c2c(s1)CCCC2)C(=O)N)NC(=O)CN(Cc1cscc1)C	2.014
AB00997295	COC(=O)c1cc2NC(=S)c3ccc(cc3Oc2s1)C(F)(F)F	2.026
AB01130774	Oc1c(nc2sc3CCCCc3c2c1c4ccccc4)c5ccccc5	2.031
AB00983236	c1(=CC(=O)c2ccccc2)c(=O)oc2c([nH]1)cccc2	2.16
AB00981421	CN(C)c1ccc(Cl)cc1NS(=O)(=O)c2cccc3N=S=Nc23	2.814
AB00979893	CCSc1nnc(SCc2oc(nn2)c3cccc(c3)[N+](=O)[O-])s1	2.844
AB01127909	Brc1ccc(SCC(=O)Nc2nc3ccccc3s2)cc1	2.847
AB01116801	CCOc1ccc(cc1)c2oc(NC(=O)C3COc4ccccc4O3)nn2	2.902
AB01128975	CC1CCN(Cc2csc(NC(=O)c3ccc4OCOc4c3)n2)CC1	3.007
AB01130649	CC1CC(Sc2nnc(c3ccccc3)c4ccccc24)C(=O)O1	3.154
AB00982198	Cc1ccc2c(Cl)cc(Cl)c(OCC(=O)c3cc(C)n(CC4CCCO4)c3C)c2n1	3.371
AB01004977	C1(=NCCS1)NC(=O)COc1c(c2c(cc1)cccc2)Br	3.507
AB00990961	c1(c2c(nc(n1)c1cnccc1)sc(c2C)C)N1CC(CO)CCC1	3.526
AB01116579	CC(C)(CNC(=S)NCCc1ccccc1)N2CCCCC2	3.552
AB01130559	O=C(Nc1nccs1)c2ccc(cc2)n3cccc3	3.676
AB01159524	CCn1nnc2cc(ccc12)C(=O)Nc3nc4ccccc4[nH]3	3.966
AB01122977	Cc1nc(c(CC(=O)Nc2ncc(Cc3ccccc3)s2)s1)c4ccc(F)cc4	3.974
AB01128735	Clc1ccc(cc1)c2nn(cc2Cc3nc4ccccc4[nH]3)c5ccccc5	4.23
AB00986015	CCCCCN(CC(=O)Nc1cc(C)on1)CC(=O)Nc2cc(C)on2	4.383
AB00775089	Cn1ccnc1C(NS(=O)(=O)c2ccc(F)cc2)c3ccc(F)cc3	4.53
AB00984220	CC(N(C)Cc1occc1)C(=O)Nc2sc3CCCc3c2C(=O)N	4.559
AB01122780	O=C1N(CSc2nc(cs2)c3ccccc3)C(=O)c4ccccc14	4.594
AB00989086	c12c(c(nc(n1)c1cnccc1)NC1CCN(C3CC3)CC1)c(c(s2)C)C	4.714
AB00981632	CC1CN(CN2N=C(N(C2=S)c3ccc(F)c(Cl)c3)c4ccc(Cl)cc4Cl)CC(C)O1	4.868
AB00989185	CC(N1CCCC1)C2=Nc3scc(c4occc4)c3C(=O)N2	4.902
AB00989636	c12c(nc(nc1N1CCN(C(=O)OCC)CC1)c1ncccc1)sc(c2)c1ccccc1	4.969
AB00982939	FC(F)(F)Sc1ccc(cc1)C(=O)NC2=NCCS2	4.988
AB00987126	Fc1ccc(CS(=O)(=O)NC(c2ccccc2)c3ccccn3)cc1	5.221
AB00979578	c1(c(sc2c1CC(NC2(C)C)(C)C)NC(=O)CNC1CCCC1)C(=O)OCC	5.287
AB00988611	n1c([nH]c2c1cccc2)CN(Cc1c(Cl)cccc1)Cc1nc2c([nH]1)cccc2	5.531
AB01137631	CC(=O)C(Sc1oc(nn1)c2ccc3OCOc3c2)c4ccccc4	5.613
AB01123841	CC(C)CN1C(=S)N\C(=C/c2ccccc2)\C1=O	5.661
AB00990617	C1(=C(N(C(=S)NC1c1cc(c(c(c1)OC)OC)Cl)c1cc2c(OCCO2)cc1)C)C(=O)OC	6.184
AB01136018	CCN(CC(=O)Nc1cc(Cl)ccc1C)CC2=NC(=O)c3c(N2)scc3c4occc4	6.22
AB00984008	Fc1ccc(cc1)c2csc3ncnc(Nc4ncnc5scc(c6ccc(F)cc6)c45)c23	6.439
AB01135954	Fc1ccc(cc1)c2csc3N=C(CN(Cc4occc4)Cc5ccccc5)NC(=O)c23	6.59
AB01128645	O=C(NC(Cc1ccccc1)C(=O)Nc2oc(nn2)c3occc3)OCc4ccccc4	6.595
AB01127944	COc1ccc(cc1)C(=O)\C=C/2\NC(=O)\C(=C\c3cccs3)\S2	6.741
AB00980886	Brc1cccc(OCCSc2nc(c3cccs3)c([nH]2)c4cccs4)c1	6.808
AB01118063	O=C(NC1=NCCS1)C(Sc2ccccc2)c3ccccc3	7.085
AB00980442	ClC1=CC2N=C(CN(CCCc3ccccc3)CC4=Nc5cc(Cl)ccc5C(=O)N4)NC(=O)C2C=C1	7.096
AB00983615	CN(C)c1ccc(cc1NS(=O)(=O)c2cccc3N=S=Nc23)C(F)(F)F	7.139
AB01160465	CC1CCN(Cc2csc(NC(=O)c3oc4ccccc4c3C)n2)CC1	7.332
AB00757100	NC(=O)c1c2CCCc2sc1NC(=O)CN(CC=C)Cc3ccc(Cl)s3	7.347
AB00989945	C1(=C(N(C(=S)NC1c1cc(c(cc1)F)Br)CCOC)C)C(=O)OC	7.367
AB00982558	CN(C)c1ccc(cc1NS(=O)(=O)c2ccc(cc2)C(F)(F)F)C(F)(F)F	7.394
AB01126584	O=C(CC1SC(=NC1=O)Cc2nc3ccccc3s2)Nc4ccc5ccccc5c4	7.485
AB01004427	CS(=O)(=O)NCC1CCCCN1CC(=O)NC(=O)NC2CCCCC2	7.672
AB00991139	N1=C(c2cc3c(OCO3)cc2)CSC(=N1)NC1CCCCC1	7.766
AB01123869	NC(=O)c1c2CCCCc2sc1NC(=O)CN(Cc3occc3)Cc4occc4	7.867
AB00987680	c1(c(c(c([nH]1)C)C(=O)C)C)C(=O)CSc1c2c(sc(c2C)C)nc(n1)CN(CC)CC	7.899
AB01136790	O=C(Nc1ccc(cc1)C(=O)Nc2nc3ccccc3[nH]2)C4CC4	7.963
AB01125936	CCc1oc2ccccc2c1CN(C)C(C)C(=O)Nc3sc4CCCc4c3C(=O)N	7.992
AB00985077	Oc1ccccc1C(=O)c2cc(C(=O)c3ccccc3)c4nc5ccccc5n4c2	8.155
AB01124062	Cc1onc(c1)n2c(C)cc(C3NC(=Nc4nc5ccccc5n34)N)c2C	8.304
AB00981936	N1=C(c2cc(c(cc2)Cl)Cl)CSC(=N1)Nc1ccc(cc1)OC	8.385
AB01122871	Brc1ccc2N=C(SCN3C(=O)c4ccccc4C3=O)N(Cc5occc5)C(=O)c2c1	8.452
AB00985843	CCCN(CN1N=C(N(CC=C)C1=S)c2ccc(Cl)cc2Cl)C3CCS(=O)(=O)C3	8.564
AB01127947	CCCc1cc(SCc2cccc3ccccc23)n4c5ccccc5nc4c1C#N	8.586
AB01137341	O=C(Nc1nc2ccccc2[nH]1)c3c[nH]nc3c4ccccc4	8.634
AB00991081	C1(=C(N(C(=S)NC1c1cc(C(F)(F)F)ccc1)C)C)C(=O)OC	8.729
AB01001401	CCCN1C(=S)N(CN(C)C2CCS(=O)(=O)C2)c3cc(Cl)ccc13	8.738
AB00986289	CC(SCc1ccc(Br)cc1)C(=O)NC2=NCCS2	8.823
AB01137601	O=C(CCc1ccccc1)Nc2nc(SCc3ccccc3)n[nH]2	9.042
AB00981391	Clc1ccc(cc1)N2C(=S)Nc3cc(Cl)ccc3C2=O	9.078
AB00993915	CC(N1CCC(CCc2ccc(C)cc2)CC1)c3nc(N)nc(n3)N(C)C	9.096
AB00985570	Cc1ccc2c(Cl)cc(Cl)c(OCC(=O)N3c4ccccc4NC(=O)C35CCCC5)c2n1	9.144
AB01137899	Cc1oc(cc1)c2n[nH]cc2C3NC(=Nc4nc5ccccc5n34)N	9.201
AB01126618	O=C1NC(=Nc2ccsc12)CSC3=Nc4ccccc4C(=O)N3CCC5=CCCCC5	9.219
AB00989766	c1(oc(nn1)SC(C(=O)Nc1noc(c1)C)C)c1sc2c(c1)CC(CC2)C	9.273
AB01128690	COc1cc2ccccc2cc1C(=O)Nc3nc4c(COc5ccccc45)s3	9.283
AB00984532	NC(=O)c1ccsc1NC(=O)CN2CCCC3CCCCC23	9.373
AB01122268	CN(CC(=O)Nc1ccccc1N2CCCC2)Cc3cnn(c3)c4ccccc4	9.438
AB00979791	Cc1ccc(cc1)c2nc(SCc3cc(cc4COCOc34)[N+](=O)[O-])[nH]c2c5ccc(C)cc5	9.484
AB00993481	CC(C)N1C(=S)N(CN2CCCN(CC2)S(=O)(=O)c3c(C)onc3C)c4ccccc14	9.605
AB00982291	CCN(CC)CCCN1CC(=O)C(=C1N)c2nc3ccccc3[nH]2	9.621
AB01138074	CN(CCOC(c1ccccc1)c2ccccc2)CC(=O)Nc3c(Cl)cccc3Cl	9.683
AB01130548	Fc1ccc(CNC(=O)c2oc(cc2)c3nc4ccccc4s3)cc1	9.827
AB00983151	CC(NS(=O)(=O)c1ccc(Br)cc1Cl)c2nc3ccccc3n2C(F)F	9.84
AB00765874	N1=C(c2cc(c(cc2)OC)Br)CSC(=N1)NCC	9.883
AB01119442	CC(Sc1oc(nn1)c2cccc(Br)c2)C(=O)NCC3CCCCC3	9.973
AB01136692	O=C1NC(=Nc2scc(c3occc3)c12)CN4CCCC4	10.031
AB01126995	CSc1ccc(CN(C)Cc2nc(N)nc(Nc3ccccc3)n2)cc1	10.099
AB01126196	CN(CCOc1ccccc1)CC(=O)Nc2onc(c2)c3ccc(C)cc3	10.169
AB00993438	c12c(c(=O)[nH]c(n1)CN(CCCC)C)c1c(s2)CCC1	10.449
AB00998290	CN(C)C(CNS(=O)(=O)c1cc(F)cc(F)c1)C2CCCCC2	10.533
AB00983115	CCCCN1C(=S)Nc2ccc(O)cc2C1=O	10.622
AB00999599	CCCN1C(=S)N(CN2CCN(CC2)c3ncccn3)c4cc(Cl)ccc14	10.654
AB01004039	CC(=O)c1csc(NC(=O)C2(C)CC2(Cl)Cl)n1	10.847
AB01127890	O=C1NC(=Nc2sc(cc12)c3ccccc3)CN4CCCCC4	10.955
AB00765423	Fc1ccc(\C=C\C2=NNC(=S)N2)cc1	11.005
AB01122313	Cc1ccc2c(CC(=O)Nc3nc4CCCc4s3)coc2c1	11.377
AB00989898	S(=O)(=O)(c1sc(cc1)Cl)N(C(c1n(ccn1)C)c1ccc(cc1)Cl)C	11.397
AB00979394	C1(=C(NC(=S)NC1c1ccc(cc1)Cl)C(F)(F)F)C(=O)OCC	11.465
AB01126210	C(NC1=NN=C(CS1)c2ccc3CCCc3c2)c4ccc5OCOc5c4	11.512
AB01128570	CC(C)CCNC1=NN=C(CS1)C23CC4CC(CC(C4)C2)C3	11.533
AB01116634	Cc1ccc2c(CC(=O)Nc3nccs3)coc2c1	11.556
AB01160847	CCOC(=O)c1cc(Cl)c(OS(=O)(=O)c2c[nH]c(c2)C(=O)N3CCCC3)c(Cl)c1	11.593
AB01126672	CC1CCN(CC(=O)Nc2nc(cs2)c3c[nH]c4ccccc34)CC1	11.851
AB01123871	Fc1ccc(cc1)C(N2CCN(CC3=Nc4ccsc4C(=O)N3)CC2)c5ccc(F)cc5	12.192
AB01007313	N1(N=C(CC1c1sccc1)c1sccc1)C(=O)CN(Cc1nc2c(c(=O)[nH]1)scc2)C	12.249
AB00987071	CCN(CN1N=C(N(CC=C)C1=S)c2ccc(cc2)C(C)(C)C)C3CCS(=O)(=O)C3	12.252
AB00989710	c1(c2oc(nn2)c2ccc(cc2)Br)sc2c(c1O)cccc2	12.486
AB01124686	CN(CC1=Nc2ccsc2C(=O)N1)Cc3ccc(Cl)s3	12.577
AB01160536	S=C(NC1CC1)N2CCn3c2nc4ccccc34	12.584
AB01162154	O=C1N(CC2(CCCCC2)N3CCCCC3)C(=S)Nc4ccccc14	12.623
AB01128161	Oc1ccc(F)cc1C(=O)c2c[nH]c(c2)c3nnc4CCCCCn34	12.625
AB00998565	CCN(CN1N=C(OC1=O)c2cccs2)Cc3ccc(Cl)s3	12.803
AB00788938	N1=C(c2ccc(cc2)Cl)CSC(=N1)NC1CCCCC1	13.039
AB01001184	CCC(CC)N(C)CN1N=C(NC1=S)\C=C\c2ccc(F)cc2	13.186
AB01005680	COCCc1ccc(cc1)S(=O)(=O)NC2(CCC2)c3ccc(Br)cc3	13.232
AB00980041	C(CC12CC3CC(CC(C3)C1)C2)Nc4nc(CN5CCCCC5)nc6sc7CCCc7c46	13.258
AB01134100	CN1\C(=C(/C#N)\C(=O)CN2CCCCCC2)\Nc3ccccc13	13.261
AB01123326	Clc1ccc(CSc2nnc(CN3CCCC3=O)n2c4ccccn4)cc1Cl	13.432
AB00710339	N12N=C(CC1c1c(OC2c2cc(Br)ccc2)cccc1)c1cc2c(OCCO2)cc1	13.498
AB00988266	COc1cc(cc(OC)c1OC)c2oc(cc2c3nc4ccccc4[nH]3)c5ccccc5	13.544
AB01123778	COc1ccc(cc1)c2nnc(SCc3cn4ccccc4n3)n2CC5CCCO5	13.584
AB01126585	O=C(Nc1nc(CN2CCOCC2)cs1)c3cc(nn3c4ccccc4)c5ccccc5	13.667
AB01129156	Fc1ccccc1N2C(=S)N\C(=C/c3cnn(n3)c4ccccc4)\C2=O	13.684
AB01122944	O=C(NC1=NCCS1)c2sccc2c3ccccc3	13.756
AB01130603	CC(C)(C)NC(=O)CN1CCN(CC1)C(=O)CSc2ncc([nH]2)c3ccc(Br)cc3	13.775
AB00983167	CN(CC(=O)Nc1sccc1C(=O)N)Cc2sccc2C	13.83
AB00998177	CC(Sc1nnc(CN2CCCC2=O)n1c3ccccn3)C(=O)C45CC6CC(CC(C6)C4)C5	13.9
AB01002807	COCc1c(sc2cccc(F)c12)C(=O)NC3=NCCS3	13.995
AB01156906	O=C(Nc1ccccc1N2CCCCCC2)c3cnccn3	14.124
AB01005577	[O-][N+](=O)c1ccccc1S(=O)(=O)N2CCN(CN3C=CN(C3=S)c4cccc(Cl)c4)CC2	14.142
AB00990926	c1(=S)[nH]c2c([nH]1)cc(c(c2)F)F	14.174
AB01128589	CCn1c(SCC(=O)OCc2csc(Nc3ccc(C)cc3)n2)nnc1c4cccs4	14.34
AB01160739	Clc1cc(Br)ccc1NC(=O)CSc2nnc(CC3CCCC3)[nH]2	14.471
AB00757780	CC1CC(C)CN(C1)C2=NNC(=S)N2Cc3occc3	14.555
AB00980356	Brc1ccc(SCc2nc(NCc3ccccn3)c4c5CCCCc5sc4n2)cc1	14.557
AB01154553	Fc1ccc(Br)cc1C(=O)Nc2nc(CN3CCCCCC3)cs2	14.603
AB00980999	c1(=C(C#N)C(=O)COC(=O)c2c(c3c(o2)cccc3)COC)[nH]c2c([nH]1)cccc2	14.611
AB00782740	CC(C)CN(CN1N=C(NC1=S)c2ccc(Br)cc2)C3CCS(=O)(=O)C3	14.851
AB01115670	O=C1NC(=Nc2sc3CCCc3c12)CSC4=Nc5ccccc5C(=O)N4Cc6occc6	15
AB01128702	CCOC(=O)c1c(NC(=O)CSc2nccn2C)scc1c3cccs3	15.194
AB00992505	S(=O)(=O)(N1CCN(Cn2c(=S)n(cc2)c2ccc(cc2)Br)CC1)N(CC)CC	15.197
AB01132985	Cc1ccc(s1)c2csc3NC(=NC(=O)c23)CN4CCN(Cc5ccc6OCCc6c5)CC4	15.208
AB01128165	O=C(CCCCC1SCC2NC(=O)NC12)Nc3nc4ccccc4[nH]3	15.212
AB01125831	Oc1ccc(cc1)N2CCN(CC2)C(=O)CSc3oc(c4ccccc4)c(n3)c5ccccc5	15.243
AB01000232	[O-][N+](=O)c1ccc2OCC(=O)N(CC(=O)Nc3nnc[nH]3)c2c1	15.3
AB00980020	Brc1cc(CSc2nc3ccccc3[nH]2)c4OC(OCc4c1)c5ccccc5	15.372
AB00994737	CN(CN1N=C(N(CC=C)C1=S)c2ccc(cc2)C(C)(C)C)C3CCS(=O)(=O)C3	15.533
AB01126007	COCc1c(sc2cccc(F)c12)C(=O)OCC(=O)C(=C3Nc4ccccc4N3)C#N	15.545
AB01115674	Cc1sc2N=C(SCc3oc(nn3)c4ccc(F)cc4)N(C5CCCC5)C(=O)c2c1C	15.558
AB00999120	CCOc1ccc2nc(SCc3onc(n3)c4ccc(OC)cc4)[nH]c2c1	15.77
AB01121450	CCCCc1ccc(cc1)C(=O)NC2=NCCS2	15.806
AB01128794	Cc1ccc2c(Cl)cc(Cl)c(OCC(=O)OCc3oc(nn3)c4ccccc4)c2n1	15.851
AB01156898	O=C(CSc1ccccc1C(=O)Nc2ncc(Cc3ccccc3)s2)NC4CC4	15.96
AB00982561	Clc1ccc(OCc2nc3ccccc3n2CC(=O)c4c[nH]c5ccccc45)c(Cl)c1	16.282
AB00982551	CN1C(=S)N(CN2CCN(CC2)S(=O)(=O)c3ccc(F)cc3)c4ccccc14	16.296
AB01136731	O=C(CCC(=O)c1ccc2OCCCOc2c1)Nc3nc4ccccc4[nH]3	16.547
AB00987323	c12c(sc3c2CCCC3)nc(nc1N)CN(Cc1sc(cc1)Br)CC=C	16.55
AB01004393	CC(NCc1cccc(Br)c1)c2ccc(cc2)n3ccnc3	16.577
AB00301664	Clc1ccc(OCCn2ccnc2)cc1Cl	16.589
AB00801745	c1(oc(nn1)SC(C(=O)NC(=O)NC(C)C)C)c1sc2c(c1)CC(CC2)C	16.718
AB00985559	Clc1ccccc1c2nnc(SC3CCC(=O)C3)n2C4CCCC4	16.743
AB00991526	CCCCN1C(=S)N\C(=C/c2ccsc2)\C1=O	16.777
AB01154563	COC(=O)c1ccc2C(=O)NC(=Nc2c1)CN(C)C(C)c3oc4ccccc4c3	16.918
AB01128569	Cc1onc(C)c1C(=O)Nc2nc(cs2)c3ccc4CCCCc4c3	16.939
AB01132831	CN(C)CCNCCOCCOc1ccccc1c2ccccc2	16.949
AB00765494	CCc1ccc(cc1)C2=NN=C(NCc3ccc4OCOc4c3)SC2	17.063
AB01130633	Cc1ccc(cc1)c2[nH]ncc2C3NC(=Nc4nc5ccccc5n34)N	17.106
AB00720973	OCCNc1nc(CSc2ccc(Br)cc2)nc3sc4CCCCc4c13	17.228
AB01128875	Cc1cccc(C)c1OCC(=O)Nc2nc(n[nH]2)c3ccccc3	17.322
AB00986953	CN(CN1C(=S)N(C)c2ccccc12)Cc3cnn(Cc4ccccc4)c3	17.467
AB01122799	NC1=Nc2nc3cc4OCCCOc4cc3n2C5(CCC(CC5)c6ccccc6)N1	17.473
AB00986638	CCN(CC)S(=O)(=O)N1CCN(CN2C=CN(C2=S)c3cc(C)ccc3C)CC1	17.597
AB01135653	Cc1cc(ccc1NC(=O)CSc2nc(CCC3CCCC3)n[nH]2)[N+](=O)[O-]	17.739
AB00996267	CC1CCN(Cc2nc(N3CC(CCC3C)C(=O)N)c4c5CCCc5sc4n2)CC1	17.904
AB01125327	O=C1Nc2ccc(cc2O1)c3csc(Cc4ccccc4)n3	17.908
AB01123767	Clc1ccc(CCC(=O)NC2=NCCS2)cc1	17.919
AB01130529	O=C(Nc1nc2ccccc2s1)c3ccc4ncsc4c3	18.023
AB01134063	CN(C)CCNCCOc1ccc(OCc2ccccc2)cc1	18.052
AB00987106	CCN1C(=S)N(CN(CC(C)C)C2CCS(=O)(=O)C2)N=C1c3ccc(cc3)C(C)(C)C	18.1
AB00989189	Cc1cc(C)cc(c1)n2nnnc2SCc3cn4ccccc4n3	18.144
AB00983960	CCOC(=O)c1sc2nc(CN3CCCCC3C)nc(N)c2c1C	18.234
AB00561639	Clc1ccc2N=C(SCN3C(=O)c4ccccc4C3=O)N(CC=C)C(=O)c2c1	18.266
AB01126805	Oc1ccccc1N2CCN(Cc3nc4ccccc4s3)CC2	18.287
AB01002725	CNC(=O)NC(=O)C(C)SC1=NCCS1	18.396
AB01122549	O=C(C(Sc1ncnc2sc(cc12)c3ccccc3)c4ccccc4)N5CCOCC5	18.654
AB00993431	n1c2n(cc1Cc1nc(c3c(OC)cccc3)cs1)cccc2	18.718
AB01118062	O=C(Nc1nc2CCCCc2s1)c3cc(nn3c4ccccc4)C5CC5	18.869
AB01116812	Cn1ccnc1COC(=O)c2ccc(OCc3ccccc3)cc2	18.895
AB00986575	CC(N1CCCC(C)C1)C2=Nc3scc(c4occc4)c3C(=O)N2	18.943
AB00987181	C1(=C(N(C(=S)NC1c1sccc1)C1CC1)C)C(=O)OC	18.955
AB00983595	CN1C(=S)N(CN2CCN(CC2)S(=O)(=O)c3ccccc3)c4ccccc14	19.002
AB00990150	N1(C(=S)NC(=Cc2sc(cc2)Br)C1=O)Cc1occc1	19.006
AB01000089	Fc1ccc(Nc2nnc(SCCS(=O)c3ccccc3)s2)cc1	19.191
AB00987047	Cc1ccc(cc1)c2csc(SCc3cn4cccc(C)c4n3)n2	19.212
AB01127948	CCCc1cc(SCc2ccccc2)n3c4ccccc4nc3c1C#N	19.269
AB01122763	O=C(CCNS(=O)(=O)c1ccc2CCCCc2c1)N3CCN(CC3)c4ccccc4	19.319
AB00982745	CN(C)CCCN1C(=S)Nc2ccc(Cl)cc2C1=O	19.348
AB01134106	CC(N1CCC(CC1)OCc2ccccc2)C3=Nc4ccccc4C(=O)N3	19.397
AB00979474	CCOc1ccc2nc(SCc3nc4ccccc4s3)[nH]c2c1	19.432
AB01121460	O=C(CCn1ccnc1)Nc2sc3CCCCCc3c2C#N	19.592
AB00988261	Cn1c(nc2ccccc12)c3cc(oc3c4ccccc4)c5ccccc5	19.711
AB00981997	CC(C)CN1C(=Nc2scc(c3cccs3)c2C1=O)SCC(=O)c4cc(C)n(c4C)c5nc(C)cs5	19.736
AB01115678	Cc1nc2ccccc2nc1CSC3=Nc4ccccc4C(=O)N3C5CCCC5	19.806
AB00987728	N1=C(c2cc3c(OCO3)cc2)CSC(=N1)Nc1cc(ccc1)C	19.97
AB01124741	Cc1ccsc1C2NC(=Nc3nc4ccccc4n23)N	19.979
AB00991237	S(=O)(=O)(NC(c1n(ccn1)C)c1ccccc1)Cc1ccccc1	19.981
AB01160813	CCCCn1nc(C)c(C(=O)Nc2nccs2)c1Cl	20.084
AB00982275	Cc1ccc(CNCc2cc(Br)ccc2OCC#C)cc1	20.093
AB01001667	CCC1CCCN(Cc2nc(N)c3ccccc3n2)C1	20.094
AB01130815	Cc1cccc2C(=O)NC(=Nc12)CN3CCN(CC3)C(c4ccccc4)c5ccccc5	20.107
AB00993504	CC1CCN(Cc2nc(N3CCC3)c4c5CCCc5sc4n2)CC1	20.181
AB00979471	COc1ccc(cc1)n2c(SCc3cn4c(C)cc(C)nc4n3)nc5ccccc25	20.185
AB01128969	O=C(Cc1csc(n1)c2ccccc2)Nc3cccc4cccnc34	20.236
AB00994507	CC(SCC(=C)C)C1=Nc2scc(c3occc3)c2C(=O)N1	20.545
AB01159526	Brc1ccc(cc1)c2ccc(\C=C\C(=O)NCc3nnc4ccccn34)s2	20.652
AB00981793	CCc1nc2ccccc2n1CCOc3ccc(Br)cc3	20.67
AB00988275	O=C(c1ccccc1)c2c(cn3c4ccccc4[nH]c23)c5ccccc5	20.732
AB01004213	Brc1cc(cs1)C(=O)NC2=NCCS2	20.736
AB00982799	C(Sc1nnc(Nc2ccccc2)s1)c3nc4ccccc4s3	20.766
AB01005295	n1(c(=S)n(c2c1cccc2)CC)CN1Cc2c(C(C1)O)c(ccc2OC)OC	20.781
AB01124843	O=C(Cc1ccc2CCCCc2c1)NC3=NCCS3	20.978
AB01132576	CC1CC1c2oc(\C=C\C(=O)NC3=NCCS3)cc2	21.056
AB01132582	O=C1N(CCC2=CCCCC2)C(=Nc3ccccc13)SCN4C(=O)c5ccccc5C4=O	21.071
AB01132081	O=C(Nc1ccnn1Cc2cccs2)c3ccc4ccccc4n3	21.086
AB00999762	C(Sc1ncc2ccccn12)c3onc(Cc4ccccc4)n3	21.124
AB00757778	CC1CCN(CC1)C2=NNC(=S)N2Cc3occc3	21.148
AB00721540	c12c(sc3c2CCC3)nc(nc1NCCCO)CSc1ccc(Cl)cc1	21.152
AB01004375	CC(SCCC12CC3CC(CC(C3)C1)C2)C(=O)Nc4cc(C)on4	21.153
AB00979974	CC(C)CN1C(=Nc2ccccc2C1=O)SCc3cc(Br)cc4COC(Oc34)c5ccccc5	21.218
AB00996637	OC(CNC(=O)NCCc1ccc(Cl)cc1)c2ccc(Cl)cc2	21.3
AB01001875	Nc1ncc(Cc2ccc(F)c(F)c2F)s1	21.369
AB01122651	O=C(Nc1nc2CCCc2s1)C3COc4ccccc4O3	21.386
AB01135739	OC(c1ccccc1)c2nc3ccccc3n2Cc4ccccc4	21.404
AB00994083	CCOc1ccc(NC2=NN=C(CS2)c3ccc(CC)s3)cc1	21.442
AB01116584	COc1ccc2c(CC(=O)NC3=NCCS3)coc2c1	21.561
AB00986335	O=C1CCc2cc(ccc2N1)S(=O)(=O)Nc3ccc(cc3N4CCOCC4)N5CCOCC5	21.627
AB01006679	S(=O)(=O)(c1cc2c(N(Cc3ccc(C(C)(C)C)cc3)CC2)cc1)N	21.697
AB00979748	Fc1ccc(N2C(=S)Nc3ccc(Cl)cc3C2=O)c(F)c1	21.704
AB01127786	CCOCCCN1C(=S)N\C(=C/c2ccccc2)\C1=O	21.751
AB00981370	CC(C)Sc1nnc(Nc2ccc(cc2)C(C)C)s1	21.775
AB00996885	C=CCN1C(=S)NN=C1Cc2csc(NC(=O)C34CC5CC(CC(C5)C3)C4)n2	21.83
AB00991142	C1(=NCCN1)SCc1c(cc(cc1C)C(C)(C)C)C	21.908
AB01001759	Clc1ccc(cc1)S(=O)(=O)NCCSC2CCCC2	21.946
AB00999229	O=C(NC1=NCCS1)C2CCCc3ccccc23	22.028
AB01134148	Cc1nn(c(C)c1CC(=O)Nc2cccc3cccnc23)c4ccccc4	22.142
AB01123380	O=C(NC1=NCCS1)c2cccc(Oc3ccccc3)c2	22.171
AB01134101	O=C(Nc1nc2ccccc2[nH]1)c3ccc(cc3)n4cccn4	22.185
AB00778283	N1=C(c2c(cc(cc2)Cl)Cl)CSC(=N1)NC(C)(C)C	22.299
AB00803955	c1(sc(nn1)CC(C)C)NC(=O)c1c(nccn1)N	22.308
AB00988707	c1(nc(nc(n1)CN(Cc1nc(nc(n1)N)N(C)C)C(C)(C)C)N)N(C)C	22.441
AB01137957	CC1CCCCN1C(=O)Nc2nc3ccccc3s2	22.442
AB00985549	C(Sc1nnc(NC2CCCCC2)s1)c3cc(on3)c4cccs4	22.486
AB01132816	Cc1nc(SCC(=O)c2c[nH]c(c2)C(=O)N3CCCC3)c4c(C)c(C)sc4n1	22.615
AB00981082	Cc1sc2N=C(CSc3nc(CN4CCCCC4)nc5sc6CCCCc6c35)NC(=O)c2c1C	22.633
AB01126880	NC1=Nc2nc3ccccc3n2C(N1)c4oc5ccccc5c4	22.646
AB00988749	n1(c(=S)n(c2c1cccc2)C(C)C)CN1CCN(c2ncccn2)CC1	22.839
AB01131315	O=C(CSc1nc2ccccc2n1C3CCCCC3)N4CCNC4=O	22.948
AB00990464	ClC1(Cl)CC1CSc2nnc(CCC3CCCC3)[nH]2	22.967
AB01122049	O=C(Nc1nc(c2occc2)c(s1)c3occc3)c4ccccc4	23.011
AB00979460	CC1(O)CCC2C3CCC4Cc5nocc5CC4(C)C3CCC12C	23.115
AB00982843	O=C(Nc1nccs1)c2cc3CCCc3s2	23.372
AB00993030	c12c(nc(n(c1=O)CCC(C)C)SC(C(=O)NC(=O)N)C(C)C)scc2c1sccc1	23.374
AB00980007	Ic1cc(I)c2cccnc2c1OCc3oc(nn3)c4ccccc4	23.422
AB01137949	O=C(CCCSc1ccccc1)Nc2nccs2	23.467
AB00988065	CC(C)CN(CN1C(=S)N(C)c2ccccc12)C3CCS(=O)(=O)C3	23.495
AB00992175	[N+](=O)(c1c(cc(cc1)F)OCC(=O)C(C)(C)C)[O-]	23.629
AB00985781	n1(c(=S)n(c2c1cccc2)CC)CN(CCC#N)CCC#N	23.77
AB01003139	CN(C)C1(CNS(=O)(=O)c2ccc(Br)s2)CCCC1	23.793
AB01127404	[O-][N+](=O)c1ccc(NCCCc2nc3ccccc3[nH]2)nc1	23.884
AB01132191	C(CNCc1cn(nc1c2ccccc2)c3ccccc3)Cn4ccnc4	24.098
AB00986297	C(N1CCCCC1)c2oc(Sc3ncnc4sc5CCCc5c34)nn2	24.126
AB00985578	c1(nc2c([nH]1)cccc2)NC(=O)C1CC2C3(C(C1)CC2)SCCS3	24.163
AB01124006	O=C(NCc1ccccn1)c2cc(nn2c3ccccc3)c4ccccc4	24.212
AB01005729	Cc1ccc(c(C)c1)c2occ(Cn3ccnc3)n2	24.236
AB00985104	CCN(CC)CC1=Nc2sc3CCCc3c2C(=O)N1	24.356
AB01123438	Cc1onc(c2ccccc2)c1C(=O)NC3=NCCS3	24.386
AB01128967	CN(CC1=Nc2ccsc2C(=O)N1)Cc3ccc4ccccc4c3	24.414
AB00983589	CN1C(=S)N(CN2CCN(CC2)S(=O)(=O)c3cccc(F)c3)c4ccccc14	24.446
AB00992066	c1(c(sc(n1)NC(=O)CN1C(=O)CSC1)c1sccc1)c1sccc1	24.5
AB00991303	Brc1cc(\C=C\2/NC(=S)N(Cc3occc3)C2=O)cc4OCOc14	24.676
AB00763067	c1(c2c(occ2)C)oc(nn1)SC(C(=O)c1ccc(cc1)Br)C	24.719
AB01152853	O=C(Nc1nc(cs1)c2ccc[nH]2)c3ccsc3	24.801
AB01005664	O=C1N(CCC2=CCCCC2)C(=Nc3ccccc13)SCc4ccccn4	24.816
AB00995363	Cc1ccc(C)c(OCCSc2nnc(NCC=C)s2)c1	24.836
AB01132158	CSc1ccc2Sc3ccccc3Nc2c1	24.963
AB00995037	Clc1cc(I)c(OCc2onc(n2)c3occc3)c4ncccc14	25.092
AB01124864	Cc1cc(ccc1[N+](=O)[O-])C(=O)NCC(=O)OCC(=O)Nc2oc(nn2)c3ccccc3	25.106
AB01007693	n1c(cn2c1cccc2)CN1C(c2c(cc(cc2)OC)OC)CCC1	25.183
AB00980077	Fc1ccc(COc2c(I)cc(I)c3cccnc23)c(Cl)c1	25.568
AB01006901	Cc1nc(N)sc1Cc2cccc(Br)c2	25.658
AB00800320	N1=C(c2sc(cc2)CC)CSC(=N1)Nc1c(F)cccc1	25.693
AB01162143	CC(NC(=O)C12CC3CC(CC(C3)C1)C2)C(=O)NCCc4nc5ccccc5[nH]4	25.809
AB01135710	Cc1cccc(C)c1NC(=O)CN2c3ccccc3C(=O)c4ccccc24	25.883
AB00984588	CC(SC1=NCCS1)C(=O)Nc2ccc(Cl)cn2	26.165
AB00996035	C=CCN1C(=S)N(CN(C2CC2)C3CCCC3)N=C1C4COc5ccccc5O4	26.167
AB01000562	Fc1cc(Br)ccc1CNCc2ccccn2	26.402
AB00981072	[O-][N+](=O)c1cccc(c1)C2SCC3N2C(=S)N(C3=O)c4ccc(Br)cc4	26.429
AB01130660	Cc1nn(c(C)c1NC(=O)c2cc(nn2c3ccccc3)c4ccccc4)c5ccccc5	26.466
AB01137394	O=C(CN1C(=O)NC(Cc2c[nH]c3ccccc23)C1=O)N(Cc4occc4)C5=CCCCC5	26.524
AB00985441	Cc1cc(C(=O)CN2C(=O)NC(C)(C2=O)c3occc3)c(C)n1c4ccc5CCCc5c4	26.731
AB00986895	S(=O)(=O)(N1CCOCC1)c1ccc(S(=O)(=O)Nc2ccc(N3CCCCCC3)cc2)cc1	26.863
AB00990843	n1(c(=S)n(c(n1)c1c(cc(cc1)Cl)Cl)c1ccccc1)CN(OC)C	26.946
AB00990472	n1(c(=S)[nH]c(n1)c1ccc(cc1)Br)CN(C(c1nc2c(s1)cccc2)C)C	26.993
AB01137855	O=C(Cc1ccc2ccccc2c1)NC(Cc3ncc[nH]3)c4ccccc4	27.063
AB01122214	C(Sc1nnc(Cc2cccs2)n1C3CCCCC3)c4cn5ccccc5n4	27.17
AB00981618	CC1CCc2c(C1)sc3nc(C)nc(N4CCN(CC4)S(=O)(=O)c5ccc6OCCOc6c5)c23	27.179
AB01133560	COC(=O)CCNC(=S)NCC(c1ccccc1)c2ccccc2	27.227
AB00987488	O=C1CN(CCN1)c2nc(nc3scc(c4ccccc4)c23)c5ccccn5	27.293
AB00989936	N1=C(c2cc(Br)ccc2)CSC(=N1)NC1CC1	27.304
AB01126981	Cc1ccc(s1)c2csc3N=C(CNC(CN4CCOCC4)c5ccccc5)NC(=O)c23	27.331
AB01129012	S=C1Oc2ccccc2N1CN3CCN(Cc4ccccn4)CC3	27.526
AB00995192	Cn1nnnc1Sc2nc(nc3scc(c4ccccc4)c23)c5ccccn5	27.552
AB01126342	CCn1c(SCC(=O)N(C)Cc2nc3ccccc3s2)ncc1c4ccc5OCCOc5c4	27.584
AB01119570	COc1ccc(CCNC(=S)N(C)CC2COc3ccccc3O2)cc1	27.655
AB00981051	Cc1ccoc1c2nnc(SCc3cc(F)cc4COC(Oc34)c5ccccc5)n2CC=C	27.748
AB00998898	CCC(C)C(N)c1nc2ccccc2[nH]1	27.791
AB00996133	C1CC1n2nnnc2Sc3nc(nc4scc(c5ccccc5)c34)c6ccccn6	27.838
AB01162181	CC1NC(=S)N(C1=O)c2ccc(N3CCCCC3)c(c2)S(=O)(=O)Nc4ccc(Cl)cc4	28.114
AB01159356	Nc1nnc(SCC(=O)N(C\C=C\c2ccccc2)c3ccc4OCCOc4c3)s1	28.15
AB01121479	CCOC(=O)C1=C(CN(C)Cc2ccc(cc2)N(C)C)NC(=O)NC1c3ccccc3	28.259
AB01152782	Fc1ccc(cc1)C(NC(=O)CCSCc2cn3ccccc3n2)c4cccs4	28.608
AB00986621	Clc1ccc(cc1)C2=NN(CN3CCc4sccc4C3)C(=S)N2CC=C	28.67
AB00988040	Fc1ccc(cc1)c2noc(CSc3nnnn3Cc4occc4)n2	28.701
AB00982035	CCOC(=O)N1CCC(CC1)Nc2nc(CN3CCC(C)CC3)nc4sc5CCCc5c24	28.726
AB01132988	COc1ccc(CN(CC2=NC(=O)c3c(N2)scc3c4cccs4)C5CC5)cc1	28.828
AB00980986	c12c(nc(nc1sc1c2CCCC1)CN1CCCCC1)N1CCN(c2ncccc2)CC1	29.178
AB00982883	O=C1OC(=N/C/1=C/c2ccsc2)c3cccs3	29.684
AB01004199	O=C(COCC1CC1)Nc2nnc[nH]2	30.075
AB00982828	C(N1CCOCC1)c2nc(N3CCc4ccccc4C3)c5c6CCCc6sc5n2	30.169
AB00992923	n1c2n(cc1CSc1[nH]c(nn1)CCC1CCCC1)cccc2	30.225
AB01133619	NC(=O)Cc1csc(NC(=O)c2n[nH]c3ccccc23)n1	30.243
AB00980070	CC(Nc1nc(CN2CCOCC2)nc3sc4CCCCc4c13)C56CC7CC(CC(C7)C5)C6	30.593
AB00982596	Cc1nc(SCC(=O)Nc2sc3CCCCc3c2C(=O)N)n(C4CCCC4)c1C	30.726
AB00980510	CCOC(=O)c1sc2nc(CN3CCCCCC3)nc(N4CCCCCC4)c2c1C	30.891
AB00983623	CCN1C(=S)N(CN2CCN(CC2)S(=O)(=O)c3cccc4N=S=Nc34)c5ccccc15	30.97
AB00982207	COc1ccc(cc1OC)N2C(=O)CC(N3CCN(CC3)c4ccc(O)cc4)C2=O	31.066
AB01152841	Clc1cccc(Cc2cnc(NC(=O)Cn3cnnn3)s2)c1Cl	31.533
AB01007323	C12(C(=O)NC3=NCCS3)CC3(c4ccc(cc4)OC)CC(C1)CC(C2)C3	31.584
AB01133527	CC(=O)NCc1oc(cc1)c2csc(NC(=O)c3csc4CCCCc34)n2	31.721
AB00980118	Clc1ccc2c(c1)nc(SCC3=CC(=O)Oc4ccc5ccccc5c34)n2Cc6ccccc6	31.734
AB00986584	CC(N(C)CN1NC(=NC1=S)\C=C\c2ccccc2)c3nc4ccccc4s3	31.964
AB00990893	s1c(nnc1NC(C)(C)C)Sc1c2c(c([N+](=O)[O-])cc1)cccn2	32.049
AB00981706	c12c(NCCNCC(O)COCc3ccc(cc3)Cl)cccc1cccc2	32.327
AB00983501	CC(Sc1nnnn1C2CC2)C3=Nc4scc(c5cccs5)c4C(=O)N3	32.364
AB00984222	CC(C)c1nc(SCc2oc(nn2)c3ccc(cc3)C(C)(C)C)n[nH]1	32.439
AB00982702	CCc1sc2N=C(SC3CCC(=O)C3)N(Cc4ccc(C)cc4)C(=O)c2c1C	32.671
AB01137609	FC(F)n1ccnc1CSc2ncnc3scc(c4ccccc4)c23	32.919
AB01121743	Cc1ccc(cc1)c2c(C)sc3N=C(CN4CCN(Cc5ccc(cc5)C#N)CC4)NC(=O)c23	32.973
AB00982550	CN1C(=S)N(CN2CCN(CC2)S(=O)(=O)c3ccc(F)c(F)c3)c4ccccc14	33.011
AB00996522	CCN1C(=S)N(CN2CCN(CC2)C(=O)N3CCOCC3)c4ccccc14	33.146
AB01003091	NS(=O)(=O)c1ccc(OCCSc2ncccc2Cl)cc1	33.149
AB01004077	CC(C)Cn1c(SCc2nnnn2C3CC3)ncc1c4ccc(Br)cc4	33.163
AB01119461	CCCCN(C(=O)c1cn2ccccc2n1)c3ccccc3	33.378
AB00987462	C(NC1=NN=C(CS1)c2ccc3OCOc3c2)c4ccccc4	33.606
AB01115693	Clc1ccc(CNC(=O)C2CSC3(CCC(=O)N23)c4cccs4)cc1	33.714
AB00987185	n1(c(=S)[nH]c2c(c1=O)cccc2)CCCOCC1CC1	33.769
AB00983842	Cc1nc2c(cc1c3nc4ccccc4[nH]3)c(C)nn2c5ccccc5	33.843
AB00983614	CN1C(=S)N(CN2CCN(CC2)S(=O)(=O)\C=C\c3ccccc3)c4ccccc14	33.859
AB00988843	n1(c(nnn1)SCc1nc2n(c1)cc(cc2)C)c1c(cc(cc1)C)C	33.963
AB01131310	O=C(COc1ccc2ccccc2c1)Nc3nc(CN4CCOCC4)cs3	34.073
AB00986444	c12c(sc3c2CCCC3)nc(nc1NC1CCC(CC1)O)C	34.257
AB01003377	OC(COc1ccc(cc1)C23CC4CC(CC(C4)C2)C3)Cn5ccnc5	34.264
AB01122755	O=C(NCc1nc2ccccc2[nH]1)C(c3ccccc3)c4ccccc4	34.37
AB00980521	CCCCN1CN(CCCN(C)c2ccccc2)Cn3c1nc4ccccc34	34.729
AB01125844	Oc1ccc(cc1)N2CCN(CC(=O)NC3CCCCCC3)CC2	34.946
AB01120629	CCc1cccc2c(c[nH]c12)C3=NN=C(NCC4CCCO4)SC3	34.973
AB00999533	C(NC(c1ccccc1)c2ccccc2)c3ccccn3	34.983
AB00992115	c12c(sc3c2CCC3)nc(nc1NC1CCC(CC1)O)CN1CCC(CC1)C	35.079
AB01126547	NC1=Nc2nc3ccccc3n2C(N1)c4cccc(Cl)c4Cl	35.14
AB00981683	COc1cc2CCN(Cc2cc1OC)c3nc(CSc4ccc(Cl)cc4)nc5sc6CCCc6c35	35.159
AB00980868	C(Nc1nc(CN2CCOCC2)nc3sc4CCCCc4c13)c5occc5	35.215
AB00989937	N1=C(c2sccc2)CSC(=N1)NC(C)(C)C	35.313
AB00984441	Cc1occc1c2oc(SCc3cc(on3)c4ccccc4)nn2	35.374
AB01132975	Fc1ccc(NC(=O)Cc2csc(NC(=O)c3cccs3)n2)cc1Cl	35.641
AB00983588	CC(C)(C)c1ccc(OCCN2C(=O)NC(C)(C2=O)c3ccc4OCOc4c3)cc1	35.884
AB01003659	FC(F)(F)c1nnc(NC(=O)CCC2CCCCC2)[nH]1	35.989
AB01115639	CC(Sc1nnc(c2ccccc2)c(n1)c3ccccc3)C(=O)Nc4ccc5OCCOc5c4	36.058
AB00721000	CCC(CO)Nc1nc(CSc2ccc(Br)cc2)nc3sc4CCCCc4c13	36.082
AB00982671	COc1ccc(OC)c2C(O)CN(Cc12)c3ncnc4sc(cc34)c5ccccc5	36.146
AB01138519	Clc1ccc(CN2CCN(CC(=O)Nc3nccs3)CC2)cc1	36.236
AB01004650	COc1ccc(cc1)N2C=CN(CN3CCN(CC3)S(=O)(=O)c4ccc(OC)cc4)C2=S	36.269
AB00983565	Clc1ccccc1OCCn2c(nc3ccccc23)C4CCCO4	36.29
AB00984608	O=C(COc1ccc2oc3CCCCc3c2c1)NC4=NCCS4	36.31
AB00989905	n1(c(=S)n(c2c1cccc2)CC)CN1CCC(c2n3c(nn2)cccc3)CC1	36.344
AB00989852	COC(=O)C1=C(C)N(C(=S)NC1c2ccc(F)cc2F)c3ccc(F)cc3	36.364
AB00980522	CC(N1CN(Cc2ccccc2)c3nc4ccccc4n3C1)c5ccc(F)cc5	36.417
AB00979449	OC1=C(C(OC1=O)c2cccc(c2)[N+](=O)[O-])C(=O)c3ccccc3	36.453
AB01135983	OC(=O)c1ccc(cc1)C2C(=C3Nc4ccccc4N3)C(=Nc5nnnn25)c6cccc(Cl)c6	36.637
AB01128008	O=C(Cc1sc(Nc2ccccc2)nc1c3ccccc3)NC4CC4	36.695
AB00987424	C1(=NC2CCCCC2N1)SCCOc1cc(ccc1)C	36.716
AB01003308	CS(=O)(=O)NCC1CCCCN1c2nc(CN3CCCCC3)nc4sc5CCCCc5c24	36.85
AB01132108	O=C(CSc1nc2ccccc2n1C3CCCCC3)NC4(CCCC4)C#N	37.043
AB01001743	CCCCCC(C)NS(=O)(=O)c1ccc(cc1)S(=O)(=O)C(F)F	37.058
AB01132757	Cc1cccc2C(=O)NC(=Nc12)CSc3nccn3Cc4ccccc4	37.167
AB00981540	O=C1NC(=Nc2scc(c3cccs3)c12)CN4CCCCC4	37.217
AB00996649	CC(N(C)Cc1ccc(Cl)cc1)c2nc(N)nc(n2)N(C)C	37.236
AB00993696	n1(c(=S)n(cc1)Cc1ccccc1)CN1CCN(CC1)c1ccccc1	37.442
AB01006966	Cc1csc(NC(=O)CSC2CCCC2)n1	37.911
AB00996846	CC1CN(Cc2cc(C)c(C)cc2O)CCO1	38.131
AB00991582	Fc1ccc(cc1)c2csc3N=C(CSCC4CCCO4)NC(=O)c23	38.192
AB00981101	CCCN1C(=S)NC(=O)C2(Cc3c(F)cccc3N4CCCC24)C1=O	38.267
AB00987295	n12c(nc(c1)CSc1nc(cs1)c1ccc(cc1)C)ccc(c2)C	38.308
AB00980086	C(N1CCCCC1)c2nc(Nc3ccc4CCCc4c3)c5c6CCCc6sc5n2	38.616
AB00979512	CCOC(=O)c1c(NC(=O)C(C)N(C)C)sc2CC(C)CCc12	38.728
AB00979680	c12n(cc(n1Cc1ccc(Cl)cc1)c1ccccc1)c1c(n2)cccc1	38.744
AB00979672	c1(c([nH]c(n1)SCc1ccc(cc1)C)c1ccc(cc1)C)c1ccc(cc1)C	38.784
AB00989098	C1(=NC2CCCCC2N1)SCCOc1ccc(cc1)C	38.867
AB00994310	CS(=O)(=O)N1CCN(CN2N=C(c3ccc(F)cc3)c4ccccc4C2=S)CC1	38.928
AB01126662	O=C1NC(=Nc2sc(cc12)c3ccccc3)CN4CCN(Cc5ccc6OCCc6c5)CC4	39.101
AB00996365	Cc1csc(NC(=O)COC(=O)c2csc3CCCCc23)n1	39.244
AB01004555	CCCCN(CC)CC1=C(C(NC(=O)N1)c2occc2)C(=O)OCC	39.462
AB01001883	Nc1ncc(Cc2ccc(cc2C(F)(F)F)C#N)s1	39.492
AB00998763	Brc1ccccc1S(=O)(=O)NCCSC2CCCC2	39.514
AB01000668	COc1ccc(OC)c2C(O)CN(CC3=Nc4ccc(Cl)cc4C(=O)N3)Cc12	39.849
AB01126965	CC(=O)c1cccc(Nc2oc(nn2)c3ccccc3F)c1	40.006
AB00986303	CC1CCN(Cc2nc(N3CCN(CC3)c4cnccn4)c5c(C)c(C)sc5n2)CC1	40.036
AB00982973	Cc1csc(CNc2nc(CN3CCCC3)nc4sc(C)c(C)c24)n1	40.186
AB00989761	n1(c(ncc1)SCc1ccc(c2c(C#N)cccc2)cc1)C1CC1	40.228
AB01126885	O=C(CN1CCCC1c2cccs2)NC(=O)NCc3ccccc3	40.248
AB01004192	Nc1nc(CSC2=NCCS2)nc3ccccc13	40.375
AB01118045	O=C1NC(=Nc2ccccc12)CN3CCCC3c4nc5ccccc5s4	40.411
AB00981670	Fc1ccccc1c2nnc(SCc3csc(n3)c4ccccc4)n2C5CC5	40.439
AB00997911	CC(N(C)CCOc1ccccc1Cl)c2nc(N)nc(n2)N(C)C	40.499
AB01161996	CCOC(=O)C1=C(CSC23CC4CC(CC(C4)C2)C3)NC(=O)NC1	40.568
AB00989102	n1(c(=S)n(c2c1cccc2)C(F)F)CN1CCN(Cc2cnccc2)CC1	40.923
AB01000139	Cc1cc(Cc2cnc(N)s2)ccc1Br	40.961
AB01126879	CN1C(=O)N(C)C(=C(C#N)C1=O)NCC(N2CCCCC2)c3occc3	41.121
AB00984976	Clc1cc(\C=C(\C#N)/c2nc3ccccc3[nH]2)cc4OCOc14	41.327
AB01003307	O=S(=O)(NCc1cocc1)c2ccc(cc2)S(=O)(=O)N3CCOCC3	41.395
AB00983602	CN1C(=S)N(CN2CCN(CC2)S(=O)(=O)c3ccccc3F)c4ccccc14	41.574
AB01004042	FC(F)(F)c1nnc(NC(=O)C2CCC=CC2)[nH]1	41.589
AB01124396	Fc1ccc(cc1)n2cncc2C(=O)OCc3csc(Nc4ccccc4)n3	42.051
AB00983160	CC(NS(=O)(=O)c1ccc2CCCCc2c1)c3nc4ccccc4n3C(F)F	42.132
AB00994194	CN(C)C1(CNc2nc3sccn3c2[N+](=O)[O-])CCCCC1	42.401
AB01004155	CC1(C)Cc2cccc(OCCNc3oc4ccccc4n3)c2O1	42.648
AB00982181	Cc1ccc(CNCc2ccccc2OCC#C)cc1	42.776
AB00984851	CCCN1C(=S)Nc2cc3OCCCOc3cc2C1=O	42.903
AB01131313	CC(C)C(C)NC(=O)CSc1nc2ccccc2n1c3ccccc3	43.009
AB00985226	CCC1CCCCN1CC2=Nc3sc4CCCc4c3C(=O)N2	43.037
AB00945714	CCCOc1cc(C)c(cc1C)S(=O)(=O)NCc2cccs2	43.161
AB01133601	CCN(C(=O)CN(C)Cc1nc2ccccc2s1)c3nc4ccccc4s3	43.167
AB00985230	COc1ccc(Cl)cc1CSC2=NC3CCCCC3N2	43.366
AB00990873	n1(c(=S)[nH]nc1CCC)CC(=O)Nc1sc(C23CC4CC(C2)CC(C3)C4)nn1	43.523
AB00989790	n1(c(=S)[nH]c(n1)c1ccc(cc1)Br)CN1CCC(c2n3c(nn2)cccc3)CC1	43.749
AB01004413	O=C(Nc1nc(CN2CCCCC2)cs1)C34CC5CC(CC(C5)C3)C4	43.846
AB00299538	c1(c(c2c(s1)CC(CC2)C)C(=O)OCC)NC(=O)CN1CCCC1	43.946
AB00982267	C(Cc1ccccc1)NC2C3CC4CC(CC2C4)C3	44.058
AB00989732	n1(c(=S)nc2n1cccn2)CN1CCC(CCc2ccccc2)CC1	44.101
AB01135446	Cc1cccc2C(=O)NC(=Nc12)CN3CCCC3c4ccc5OCCOc5c4	44.145
AB00985186	CN(C)CCNS(=O)(=O)c1c(C)c(Cl)cc(C)c1Cl	44.261
AB01002716	CC(C)CC(CNS(=O)(=O)c1ccccc1Br)N2CCCC2	44.263
AB01122215	CC1CCc2sc(cc2C1)c3oc(SCc4cn5ccccc5n4)nn3	44.674
AB00998069	Clc1ccc(Cc2nc(CSc3nnc(NC4CC4)s3)cs2)cc1	44.783
AB00996621	Fc1cc(F)cc(c1)S(=O)(=O)NCCSCc2ccsc2	44.808
AB00997707	COc1ccc(OC)c2C(O)CN(CN3C(=S)N(C)c4ccccc34)Cc12	45.037
AB00986641	CCc1cccc2c(c[nH]c12)C3=CCN(CC3)S(=O)(=O)N4CC(C)OC(C)C4	45.383
AB00421745	Clc1cc(Cn2cnc3ccccc23)c4OCOCc4c1	45.558
AB00985281	COc1ccc(cc1[N+](=O)[O-])S(=O)(=O)NC2CCc3ccccc23	45.643
AB00984750	CC(C)(C)NC(=O)Nc1ccc(cc1N2CCOCC2)N3CCOCC3	45.748
AB00987536	Nc1ccccc1C2=NNC3(CC(=NN3)c4ccccc4)C(=O)N2	45.794
AB00983660	COc1cccc(c1)C2NC(=Nc3nc4ccccc4n23)N	46.062
AB00998771	CC(NS(=O)(=O)c1ccc(cc1)S(=O)(=O)C)C(c2ccccc2)c3ccccc3	46.183
AB01000072	CN(CC(=O)NC(=O)NCCC1=CCCCC1)Cc2ccc(Cl)s2	46.211
AB00991026	Cc1oc(c(C#N)c1C(=O)NC2=NCCS2)n3cccc3	46.328
AB00982988	Cc1occc1c2oc(SCc3onc(n3)c4ccc(F)cc4)nn2	46.946
AB01128943	Nc1nc(CN2C(=O)C3CC=CCC3C2=O)nc(Nc4ccc(F)cc4)n1	47.067
AB01132835	Cc1ccc(OCCn2cnc3ccccc23)c(C)c1	47.094
AB00986933	O=C(CCc1ccc2OCOc2c1)NC3=NCCS3	47.239
AB00981360	CC(C)(c1ccccc1)c2ccc(OCC(O)CNCCSc3ccc(Br)cc3)cc2	47.251
AB00995501	CCN(CC)S(=O)(=O)NC(C)c1ccc(cc1)c2ccccc2	47.308
AB00986969	o1c(cc(c1c2ccccc2)c3nc4ccccc4[nH]3)c5ccccc5	47.335
AB01001113	Nc1nnc(SCc2coc(n2)c3cccc(Cl)c3)[nH]1	47.453
AB01007194	c1(n[nH]c(c1)C1CC1)C(=O)N(Cc1sc(cc1)Cl)CC=C	47.47
AB00999258	[O-][N+](=O)c1cc(ccc1Cl)c2csc(Cc3cn4ccccc4n3)n2	47.574
AB01125930	Brc1ccccc1C=C2C(=O)c3ccccc3C2=O	47.604
AB00518779	Cc1cc(\C=C\2/SC(=S)NC2=O)c(C)n1C3CC3	48.162
AB00997714	C(SCc1nnnn1c2ccccc2)c3cc(on3)c4ccccc4	48.45
AB00990362	c1(c2nc(nc(n2)N)Nc2c(CC)cccc2)c(c2c(o1)cccc2)N	48.515
AB00766026	CN(CCO)c1nc(CN2CCCCC2)nc3sc4CCCc4c13	48.529
AB01002546	CC(C)(C)C(=O)CSc1nc2ccccc2c3nc4ccccc4n13	49.163
AB00983691	NC1=Nc2nc3ccccc3n2C(N1)C4=COc5ccccc5C4=O	49.202
AB00798415	N1=C(c2sc(cc2)CC)CSC(=N1)Nc1c(OC)cccc1	49.252
AB01122974	CC(N1CCN(Cc2ccc3OCOc3c2)CC1)C(=O)Nc4sc5CCCc5c4C(=O)N	49.262
AB01160703	O=C(NC1=NCCS1)C2CCN(CC2)c3oc4ccccc4n3	50.32
AB01000081	CC(C)C(NC(=O)C)C(=O)Nc1nnc[nH]1	50.38
AB00993971	ClC(=C)CSc1nnc(NCCc2cccs2)s1	50.603
AB01004159	C(Nc1oc2ccccc2n1)C3(CC3)c4ccccc4	50.775
AB01005835	c12c(sc3c2CCC3)nc(nc1NCCCCN1CCN(CC1)C)CN1CCC(CC1)C	51.105
AB00983575	Cc1ccc(N2N=NN(CN3CCN(CC3)C(c4ccccc4)c5ccccc5)C2=S)c(C)c1	51.267
AB00983062	COC(=O)C1=C(C)N(C)C(=S)NC1c2ccc(cc2)C(=O)OC	51.296
AB01117127	NC1=C(C(=O)CN1CCN2CCOCC2)c3nc4ccccc4[nH]3	51.509
AB00979415	Cc1cc(C2NC(=Nc3nc4ccccc4n23)N)c(C)n1c5cc(ccc5N6CCOCC6)C(F)(F)F	51.571
AB00983606	CC1CCN(CN2N=C(NC2=S)c3cc(Cl)ccc3Cl)CC1	51.578
AB01003840	NCc1nc(c[nH]1)c2ccccc2	51.745
AB00458923	O=C(Cc1ccccc1)Nc2nc3ccccc3s2	51.76
AB00993056	c12c(nc(n(c1=O)CC=C)SC(C)C)scc2c1occc1	52.211
AB00982161	COC(CN(Cc1nc(N)nc(Nc2ccc(C)cc2)n1)Cc3nc(N)nc(Nc4ccc(C)cc4)n3)OC	52.358
AB00985174	COCc1c(oc2ccccc12)C(=O)NC3=NCCS3	52.422
AB01004323	COCCN1C=NN(CN2CC(O)c3c(OC)ccc(OC)c3C2)C1=S	52.636
AB00982435	[O-][N+](=O)c1ccc2nc(SCCCC#N)sc2c1	52.756
AB00993378	c12c(c(=O)[nH]c(n1)CSCC(=O)NCCCOCC1CC1)c1c(s2)CCCC1	53.074
AB01000407	CN(CC(F)(F)F)S(=O)(=O)c1ccc(cc1)[N+](=O)[O-]	53.132
AB01000359	O=C(CCN1C(=O)C2CCCCC2C1=O)Nc3nnc[nH]3	53.456
AB00983120	[O-][N+](=O)c1cccc(c1)C2=NN=C(NC3CCCCC3)SC2	53.685
AB00994023	CC(C)C(SC1=NCCS1)C(=O)NC(=O)N	53.79
AB01115667	COc1ccccc1Oc2ccc(c3cnccc23)[N+](=O)[O-]	53.798
AB00991566	CC(C)SCC(=O)Nc1nc(cs1)C2CC2	54.144
AB00983951	CN1CCN(CC1)c2nc(C)nc3sc4CCCCCc4c23	54.186
AB00985660	OCCNc1ccc(cc1NCc2cc(Cl)cc3COCOc23)[N+](=O)[O-]	54.769
AB00123982	Cc1ccc(\C=C/2\SC(=N)NC2=O)cc1	54.83
AB00983684	CCCN1C(=S)NC(=O)C2(Cc3cc(ccc3N4CCCCC24)[N+](=O)[O-])C1=O	55.706
AB00728706	CN(Cc1ccc(OCC=C)cc1)c2nc(CN3CCOCC3)nc4sc5CCCc5c24	55.81
AB00981996	Cc1ccccc1Nc2nc(N)nc(CN3CCCC3c4nc5ccccc5s4)n2	56.005
AB01004770	c12c(nccc2)c(ccc1N)OC	56.206
AB00981983	O=C(Nc1nc2ccccc2s1)C3(CC3)c4ccccc4	56.272
AB00984093	CC(NS(=O)(=O)\C=C\c1ccccc1)c2ccccn2	56.328
AB00993728	S(=O)(=O)(N(C(c1ccc(n2cnc3c2cccc3)cc1)C)C)N1CCCCC1	56.491
AB00996785	Cc1onc(n1)C2(CCCCC2)NS(=O)(=O)c3ccc(cc3)C4CCCCC4	56.498
AB00984687	Clc1ccc(cc1)C2=NN=C(NC3CCCC3)SC2	56.529
AB01001297	C(Sc1oc2ccccc2n1)c3nccn3Cc4ccccc4	56.768
AB00997479	ClC1(Cl)CC1CSc2nc(c[nH]2)c3ccccc3	56.925
AB00982016	CCC(C)c1ccc(cc1)S(=O)(=O)N2CCN(Cc3cn4cc(C)ccc4n3)CC2	57.118
AB01002686	O=C(CCc1onc(n1)c2cccs2)NC3=NCCS3	57.452
AB00987072	CCN(CC)S(=O)(=O)N1CCN(CN2C=CN(C2=S)c3ccc(C)cc3C)CC1	57.465
AB00986978	O=C(CNc1nc(CN2CCCCC2)nc3sc4CCCCc4c13)N5CCCC5	57.582
AB01007556	S(=O)(=O)(NC(c1n(ccn1)C)c1ccccc1)N1CC(CCC1)C	57.616
AB00984172	CCSc1nnc(Sc2ccccc2[N+](=O)[O-])s1	57.646
AB00985339	CC1CCN(CC1)c2nc(CN3CCOCC3)nc4scc(c5cccs5)c24	57.838
AB01003933	O=C1NC(=CC(=O)N1)CSC2=NCCS2	58.046
AB01006934	Cn1c(nc2ccccc12)C3CCCN3	58.186
AB00998233	Cc1oc(nc1CN2CCCc3ccccc23)c4ccccc4	58.515
AB00990286	C(=O)(NC1=NCCS1)c1c(C(=O)c2ccc(cc2)Br)cccc1	58.577
AB01120234	Fc1cccc(Cl)c1CNC(Cc2ccccc2)c3nc4ccccc4[nH]3	58.722
AB00981631	Brc1ccc(SCc2nc(NC3CCCC3)c4c5CCCCc5sc4n2)cc1	58.723
AB01116610	NC(=S)c1ccsc1	59.037
AB01127906	CCOc1cc2CC(C)Oc2cc1NC(=O)c3ccccn3	59.453
AB00991427	N1(C(=S)NC(=Cc2cc(sc2)Br)C1=O)CCCC	59.462
AB00985310	CC1CCc2sc(cc2C1)c3oc(SCC(=O)NCC=C)nn3	59.501
AB00985858	COc1ccc(cc1)n2nnnc2SCC(O)COc3ccc(Cl)cc3Cl	59.751
AB00986945	C(N1CCCCC1)c2nc(NC3CCN(CC3)C4CC4)c5c6CCCCc6sc5n2	60.03
AB00985857	CS(=O)(=O)N1CCN(CN2C=CN(C2=S)c3cccc(F)c3)CC1	60.318
AB01003412	NS(=O)(=O)c1ccc2N(Cc3oc(nn3)c4ccccc4)CCc2c1	60.337
AB00788822	S(=O)(=O)(NC(c1ccc(n2cncc2)cc1)C)c1ccc([N+](=O)[O-])cc1	60.532
AB00992273	n1(c(=S)[nH]c(n1)C=Cc1ccccc1)CN1C(c2ccccc2)CCC1	60.787
AB00985399	CC(N(C)Cc1oc(nn1)c2oc(Br)cc2)c3ccc(F)cc3	60.977
AB00987333	c12c(c(=O)[nH]c(n1)CSc1n(nnn1)C)c1c(s2)CCC1	61.075
AB00422210	Cc1ccc2c(CC(=O)NC3=NCCS3)coc2c1	61.256
AB01161995	CC(Sc1nnc([nH]1)C2CCCC2)C(=O)Nc3cccc(c3)C(F)(F)F	61.264
AB01128637	Cc1oc(C)c(c1)c2oc(CSc3ccc4ccccc4c3)nn2	61.324
AB00781690	CC(NS(=O)(=O)c1ccc(Br)cc1)c2ccc(cc2)n3ccnc3	61.797
AB00989719	c1(c(c(nc(=S)[nH]1)CC)c1ccc(cc1)Cl)N	61.905
AB00981418	C(N1CCOCC1)c2nc(N3CCCCCC3)c4c5CCCc5sc4n2	62.245
AB00999902	COc1cc(F)c(cc1OC)S(=O)(=O)NC(C2CCCC2)c3ccc(F)cc3	62.263
AB01001045	C(Nc1nc(CN2CCOCC2)nc3sc4CCCc4c13)C5COc6ccccc6O5	62.293
AB00997160	Nc1ncc(Cc2ccc(Cl)cc2F)s1	62.319
AB00993553	c1(n(c(nn1)c1ccc(C(C)(C)C)cc1)C1CCCCC1)Sc1nn2c(nnn2)cc1	62.334
AB01001149	Brc1cccc(c1)c2csc(NC3CC3)n2	62.571
AB00988604	n1(c(=S)n(cc1)Cc1ccccc1)CN1CCN(c2c(F)cccc2)CC1	62.73
AB00990036	S=C1N(CN(CCC#N)CCC#N)N=C(Cc2cccs2)N1C3CCCCC3	62.751
AB00999157	CC(SC(F)(F)F)C(=O)Nc1nc(C)c(C)s1	62.876
AB01000669	COc1ccc(cc1)C(CNS(=O)(=O)N2CCOCC2)c3c[nH]c4ccccc34	62.913
AB01002526	Cc1ccc(NC(=O)C2(CCCC2)C#N)cc1I	63.026
AB00999467	Cc1nc(cs1)c2c[nH]c(c2)C(=O)Nc3nc4CCCc4s3	63.396
AB00990210	n1c(c(=S)[nH]c2c1cccc2)C	63.397
AB01127458	O=C(CCN1C=Nc2ccccc2C1=O)Nc3ccccn3	64.15
AB00996734	CCC(CC)NC(=O)c1cc(Cl)c[nH]1	64.157
AB00998482	C(Sc1oc(nn1)c2ccc[nH]2)c3onc(Cc4ccccc4)n3	64.192
AB00980367	Brc1ccc(SCc2nc(NCc3cccnc3)c4c5CCCCc5sc4n2)cc1	64.287
AB00988603	c1(c(=O)n2c(nc1NCCN(C)C)cccc2)[N+](=O)[O-]	64.329
AB00982220	CC1CCCN(CC(O)COC(c2ccccc2)c3ccccc3C)C1	64.439
AB00983789	O=C(CSc1oc(nn1)C2COc3ccccc3O2)c4ccc5CCCCc5c4	64.565
AB01122592	Cc1cccc2nc(cn12)C(=O)N(CCc3cccs3)Cc4cccs4	64.784
AB00996487	O=C(NC1=NCCS1)C2=NNC(=O)c3ccccc23	64.885
AB00986135	c1(c2c(occ2)C)oc(nn1)SCc1ncc(o1)c1ccc(cc1)F	64.929
AB01006911	Cc1sc(N)nc1Cc2ccccc2	65.352
AB01007399	c1(nc(nc(n1)CN(CC12CC3CC(C1)CC(C2)C3)C)N)N(C)C	65.376
AB00999126	CC1CCCN(Cc2ccc(Nc3ccc4nnc(n4n3)C(F)(F)F)cc2)C1	65.87
AB00983152	CCSc1nnc(NC(=O)CSC(C)(C)C)s1	66.023
AB00985144	Cn1c(nc2ccccc12)c3c(N)n(Cc4cccnc4)c5nc(C#N)c(nc35)C#N	66.184
AB00997093	Cc1ccc(s1)C(=O)Nc2nnc[nH]2	66.216
AB00984810	COc1cc(OC)cc(c1)c2oc(SCc3cn4ccccc4n3)nn2	66.619
AB00979688	c12n(cc(n1c1cc(c(cc1)OCC)OCC)c1ccccc1)c1c(n2)cccc1	66.715
AB01121997	Brc1cc2OCOc2cc1\C=C\3/SC(=S)NC3=O	66.719
AB00984554	[O-][N+](=O)c1cc(Cl)ccc1Sc2oc(nn2)C3CC3	67.238
AB00994831	CC(Sc1nc(C)c(C)n1C2CCCC2)C(=O)NC(=O)NC3CCCCC3	67.455
AB00985397	OC(C1CCN(CC1)c2nc(CN3CCOCC3)nc4sc5CCCCc5c24)c6ccccc6	67.509
AB00997569	CC(Nc1ccc(cc1C)N2CCOCC2)C#N	67.72
AB01007474	S(=O)(=O)(NC(c1n(ccn1)C)c1ccccc1)N1CCC(CC1)C	67.746
AB01134061	Cc1cc(C)c(OCCCCN2CCNCC2)c(CC=C)c1	68.208
AB00990856	c1(nc(on1)CNC(c1sccc1)c1ccc(cc1)F)c1sccc1	68.361
AB01003315	CS(=O)(=O)c1ccc2N(CN3C(=S)N(C(F)F)c4ccccc34)CCCc2c1	68.375
AB00990454	CN1CC(=O)N(CCCC(=O)Nc2nc(cs2)C34CC5CC(CC(C5)C3)C4)C1=O	68.436
AB00998341	CCCn1nnnc1Cn2nnc(n2)c3cccc(Cl)c3	68.879
AB00994524	CCC1(NC(=O)N(CC(O)c2ccc(Cl)cc2)C1=O)c3ccc(Cl)cc3	69.2
AB00998450	O=C(CCN1C(=O)C2CC=CCC2C1=O)Nc3nnc[nH]3	69.28
AB01002074	CN(CC(=O)Nc1sccc1C(=O)N)Cc2ccsc2	69.494
AB00994240	CC(C)Cn1c(Sc2ccc3nnnn3n2)ncc1c4ccc(Br)cc4	69.564
AB00763763	CC1CCN(Cc2nc(N(C)CCO)c3c4CCCc4sc3n2)CC1	69.869
AB00840276	Fc1ccc(cc1F)c2csc(NC(=O)CN3CCCCC3)n2	70.002
AB01001772	CS(=O)(=O)N1CCCN(CN2N=C(OC2=O)c3cccs3)CC1	70.241
AB01003708	CN(CCC#N)c1ccc(CNCC2(CC2)c3ccccc3)cc1	70.317
AB00795811	N1(C(=O)NC(C1=O)(c1c(cc(cc1)Cl)Cl)C)Cc1ccc(cc1)C	70.375
AB01001000	CN(C)C(CNc1cc(C)nc2ncnn12)Cc3ccccc3	70.954
AB01007285	N1(CC(COC(c2ccc(cc2)F)c2ccc(cc2)F)O)C(CCO)CCCC1	71.04
AB00987429	n1(c(=S)n(cn1)CC)CN1CCN(C(c2ccc(cc2)F)c2ccc(cc2)F)CC1	71.322
AB00988073	Clc1c(sc2ccccc12)c3oc(SC4CCCCC4=O)nn3	71.664
AB00981372	CN(Cc1ccc(cc1)C(F)(F)F)c2nc(CSc3ccc(Cl)cc3)nc4sc5CCCc5c24	72.353
AB01005479	N1(Cc2c(cccc2)CC1)CC(O)CNCc1c(c(Cl)ccc1)Cl	72.569
AB01005373	Cc1ccc(s1)c2cc(n[nH]2)C(=O)N3CCC4CCCCC4C3	72.898
AB00980542	CN1\C(=C(/C#N)\C(=O)CN2CCCc3ccccc23)\Sc4ccccc14	72.899
AB00118331	COCCN1C(=S)Nc2ccccc2C1=O	73.409
AB00979531	N1(C(=O)C(NC1=O)(c1ccccc1)c1ccccc1)Cc1ccccc1	74.199
AB00983091	C(Sc1ccccc1)c2nc(N3CCN(Cc4ccccn4)CC3)c5c6CCCc6sc5n2	74.404
AB00998196	O=C1N(CC2(CCCC2)N3CCSCC3)C(=S)Nc4ccccc14	75.167
AB00990579	n1(c(nnn1)SCc1nnc(o1)C)c1cc(cc(c1)C)C	75.434
AB00986128	c1([N+](=O)[O-])c(Sc2sc(nn2)C)ccc(c1)F	75.608
AB01136732	Fc1ccc(CNC2=NN=C(CS2)c3ccc4NC(=O)CCc4c3)cc1	75.789
AB00990829	[N+](=O)(c1c2c(c(N3CCC(C(c4ccccc4)O)CC3)cc1)nccc2)[O-]	76.586
AB00991801	Cc1ccc(Br)cc1S(=O)(=O)NC2CCc3ccccc23	76.702
AB01002206	CC(C)C(CNC1=NN2C(=O)C=C(C)N=C2S1)N(CC=C)CC=C	76.707
AB00982945	Cc1ccc(C)c(c1)n2nnnc2SCc3cn4cc(C)ccc4n3	76.763
AB01127763	N#Cc1c2CCCCc2c(NCCN3CCCCCC3)n4c5ccccc5nc14	76.84
AB01003942	CC(C)CSCCC(=O)Nc1nnc[nH]1	76.959
AB00992869	c1(C(=O)NC2c3c(SCC2)ccc(c3)F)cc(c[nH]1)Br	76.985
AB00987520	Cc1cccc(c1C)n2nnnc2SCc3ccc(cc3)n4ccnc4	77.425
AB01005938	C(=O)(N1CCSCC1)Nc1cc(c(N(C2CCCCC2)C)cc1)F	77.762
AB00996025	Brc1ccc(s1)S(=O)(=O)NCCCOCc2ccccc2	78.41
AB00994573	NS(=O)(=O)c1ccc(OCCSc2ccc(cn2)C(F)(F)F)cc1	78.503
AB00990446	CCCN1CCN(CC1)c2ccc(c3cccnc23)[N+](=O)[O-]	78.58
AB01003093	CN(C)C1CCN(CC1)c2ncnc3c2oc4ccccc34	79.115
AB00979746	c12c(sc3c2CCCCC3)nc(nc1SCc1ccc(Cl)cc1)C	79.373
AB01137712	O=C(Cc1csc(NC(=O)c2cccs2)n1)Nc3ccccn3	79.486
AB00990178	c1(c(c2c(s1)CCC2)C(=O)OCC)NC(=O)CNC(CC)(C)C	79.503
AB00985737	n1(c(nc2c(c1=O)ccc(c2)Cl)SCC1OCCC1)C1CCCC1	79.605
AB00994571	Cn1ccnc1C(Nc2nc3ccccn3c2[N+](=O)[O-])c4ccc(F)cc4	79.885
AB00984475	Clc1ccc2sc(SCc3oc4ccccc4n3)nc2c1	80.212
AB01126833	COCCN1C(=S)Nc2ccc(Cl)cc2C1=O	80.348
AB00993242	N1(C(=S)NC(C1=O)CCSC)C1CCC(CC1)C	80.553
AB00996788	S=C1N=CC=CN1CN2CCN(CC2)C(c3ccccc3)c4ccccc4	81.3
AB00993037	c12c(c(=O)[nH]c(n1)CN1NC(=O)CC1C)c1c(s2)CCC1	81.428
AB01137821	Fc1ccc(C(=O)CSc2oc3ccccc3n2)c(F)c1	81.451
AB00983947	Fc1ccc(cc1)N2CCN(CC2)c3ncnc4sccc34	81.875
AB01137711	Oc1ccccc1N2CCN(Cc3ccc(cc3)C(F)(F)F)CC2	81.977
AB00987537	Cc1nc(N)sc1Cc2ccc(OC(F)(F)F)cc2	82.648
AB00987078	COCC(=O)Nc1nc(c2cccs2)c(s1)c3cccs3	82.799
AB01000201	CCN1CC(CN(C)Cc2nc(N)nc(Nc3ccccc3C)n2)Oc4ccccc14	83.028
AB00982107	n1(ccc2c1cccc2)CCCNCc1cc(c(Cl)cc1)Cl	83.113
AB00997797	CC(C)C(NS(=O)(=O)N(C)C)c1ccc(cc1)C(C)(C)C	83.377
AB00995480	Clc1cccc(OCC(=O)N2CCSc3ccccc23)c1	83.604
AB00979786	Oc1ccc(C(=O)CSC2=Nc3sc4CCCCc4c3C(=O)N2C5CCCCC5)c(O)c1	84.196
AB00992615	c1(=O)n(c2c(o1)cc(cc2)Cl)CC#N	84.602
AB00985665	CN(CC(=O)NC1CC1)c2nc(C)nc3sc4CCCCc4c23	84.615
AB01004029	CC(NS(=O)(=O)c1ccc(cc1)C2CCCCC2)C3CCCO3	84.806
AB00979695	c12c(nc(nc1NC1c3c(CCC1)cccc3)CN1CCOCC1)scc2c1ccccc1	85.225
AB00443880	c1(c(c2c(c(c1)O)cccc2)O)C(=O)O	85.312
AB01006324	c1([nH]c(nn1)NC(=O)CCC1CCCC1)C(F)(F)F	85.959
AB00979851	CCOC(=O)c1sc2nc(C)nc(NCCC(=O)OC)c2c1C	85.962
AB00990402	O=C(CSc1oc(nn1)C2CC2)Nc3sc4CCCc4c3C#N	86.39
AB00990841	c12sc(nn1cc(n2)c1ccccc1)N(Cc1cscc1)C	86.423
AB00993291	c12C(N(CCc3ncccc3)CCc1cc(c(c2)OC)OC)c1ccccc1	86.436
AB00993220	c1(n(c(nn1)c1ccc(C(C)(C)C)cc1)C1CCCC1)Sc1nn2c(nnn2)cc1	87.474
AB00988630	c12c(n(nc2)C)ncnc1Nc1cc2c(cc1)CCC2	87.579
AB01005691	CC(C)N(C)C1CCN(CC1)c2nc(nc3ccccc23)c4ccncc4	87.589
AB00991831	C\C=C\C=C\C(=O)Nc1nc(cs1)c2cc(Cl)sc2Cl	87.894
AB00993894	COc1ccc(OC)c(c1)C(C)Nc2ccc3nnnn3n2	88.18
AB00987045	Cn1cccc1C2CCCN2CC(=O)Nc3sccc3C(=O)N	88.815
AB01006184	c1(n[nH]c(c1)c1sc(cc1)C)C(=O)NC1=NCCS1	89.349
AB01003284	NS(=O)(=O)c1ccc2N(Cc3cc(Cl)c4OCCCOc4c3)CCc2c1	89.434
AB01002638	COc1cccc(OCc2cc(CN)ccc2F)c1	92.06
AB01003585	NCc1ccc(c(F)c1)n2ccnc2	92.231
AB00996205	Brc1ccc(CNc2ccc(cn2)C#N)s1	92.755
AB01003212	Cc1ccc(s1)S(=O)(=O)N2CCCC(C2)C(=O)NC3=NCCS3	93.198
AB00982571	CC(C)CCNc1nnc(c2ccc(C)c(C)c2)c3ccccc13	93.3
AB01004249	N#Cc1ccc(OCCSC2=NCCS2)cc1	93.563
AB01128984	Brc1oc(cc1)C(=O)NC(Cc2ncc[nH]2)c3ccccc3	95.09
AB01005210	c12n(nc(s1)NC1C(C)CCCC1)cc(n2)C	95.265
AB01003225	Nc1nc(COc2cc(Cl)ccc2Cl)cs1	96.418
AB01007406	C1(=Cc2cc(c(c(c2)OC)O)OC)C(=O)c2c(OC1)cccc2	97.376
AB00991452	N1(C(=O)C2(CC1=O)CCCCC2)CC(COc1c(cc(c(c1)C)Cl)C(C)C)O	97.453
AB01000439	NCc1ccc(COc2ccccc2)cc1	99.233
AB01003092	O=C(OCc1csc(Nc2ccccc2)n1)C3=Cc4ccccc4OC3	99.257
AB00993620	n1c(scc1c1cc(c(cc1)OC)Br)c1occc1	101.069
AB01002631	CC1Cc2cc(ccc2N1Cc3ccccc3C)S(=O)(=O)N	101.65
AB00994993	Cc1cc(C)cc(c1)n2nnnc2SC3CCOC3=O	101.932
AB00996242	CC(=O)Nc1ccc(s1)C(=O)OC2CCCCCC2	103.138
AB00991210	c12c(N3CCN(c4nccnc4)CC3)ncnc2scc1c1ccccc1	103.345
AB00981545	Cc1ccc(C)n1c2ccc(cc2[N+](=O)[O-])C(F)(F)F	104.09
AB00998524	CC1CCCN(C1)S(=O)(=O)NCCOc2ccc(F)cc2	104.092
AB00993440	c1(nc(nc(n1)N)Nc1ccccc1)C(=Cc1cc(c(cc1)F)F)C#N	104.848
AB00983804	Cc1nn(CC(=O)c2cccn2C)c(C)c1[N+](=O)[O-]	105.21
AB01003362	COC(=O)c1ccc(NC(=O)CCC2CCCC2)s1	105.252
AB00991543	O=C(CC1CCCC1)Nc2nc(cs2)C3CC3	105.655
AB00998737	O=C(CCc1ccc2OCCOc2c1)NC3=NCCS3	105.981
AB00984180	Cc1ccc(cc1C)n2nnnc2SCc3cn4cccc(C)c4n3	106.223
AB00987862	c12c(=O)[nH]c(nc1ccs2)CN(Cc1c(ccs1)C)C	106.476
AB00992225	S(=O)(=O)(NC1c2c(SCC1)c(F)ccc2)c1c(ccc(c1)C)C	107.557
AB00985941	n1(c(nnn1)SCc1c(c2c(s1)cccc2)Cl)C1CC1	107.645
AB00991816	CC(C)(C)Nc1nc(cs1)c2cc(F)ccc2F	109.136
AB00995477	Clc1c[nH]c(c1)C(=O)OCC(=O)N2CCc3sccc3C2	109.297
AB01001071	Cc1nc2ccccc2nc1SC3CCCCC3=O	110.711
AB00982164	Cc1cc(Nc2ccc(F)cc2)n3ncnc3n1	111.244
AB01124873	CCN1CC2=Nc3ccccc3C(=O)N2C=C1C	111.385
AB00986137	c1(sc(nn1)SCCCC)SC(C(=O)NC(=O)N)C(C)C	114.214
AB00990310	S(=O)(=O)(c1cc(C(F)(F)F)c(cc1)Cl)NC1CCCC1	115.536
AB00985206	CC1CN(CN2N=C(OC2=O)c3cccs3)CCO1	117.576
AB01137720	[O-][N+](=O)c1ccc(SCC(=O)NCC#C)cc1	118.354
AB01000275	Nc1nccnc1C(=O)NC2=NCCS2	118.756
AB01005503	C1(=Cc2c(ccc(c2)Br)F)C(=O)c2n(C1)ccc2	121.262
AB01000688	NCC(O)COc1ccc(F)cc1	121.304
AB01007745	c12c(N3CC(OCC3)CC)ncnc2scc1c1ccccc1	122.073
AB00790273	n12c(nnn2)ccc(n1)NC(c1ccc(cc1)C(C)C)C(C)C	123.619
AB00998494	CC1(C)NC(=O)N(CCSc2ccc(cc2)[N+](=O)[O-])C1=O	125.806
AB00998721	N#Cc1cccc(CN2CCOc3ccccc23)c1	125.839
AB00992593	n12c(ncn2)nc(cc1N1CCC(Cc2ccccc2)CC1)C	126.854
AB00993206	[N+](=O)(c1cnc(NC(C2C3CC(C2)CC3)C)cc1)[O-]	128.084
AB00999449	CNCCCc1c[nH]nc1c2ccc(F)cc2	146.186
AB00083083	C(c1ccc(OCC(CNC(C)C)O)cc1)(C)(C)C	132.52

## Sheet: Table_S2
Name	Group	SMILES	MIC
ENM 324	Pyridinyl thieno-pyrimidines	Fc1ccc(cc1)-c1csc2ncnc(Nc3ncnc4scc(-c5ccc(F)cc5)c34)c12	5
ENM 509	Pyridinyl thieno-pyrimidines	Cc1sc2nc(nc(N3CCCC(CO)C3)c2c1C)-c1cccnc1	1.25
ENM 712	Imidazole sulfonamides	Cn1ccnc1C(NS(=O)(=O)c1ccc(F)cc1)c1ccc(F)cc1	20
ENM 076	Imidazole sulfonamides	CN(C(c1nccn1C)c1ccc(Cl)cc1)S(=O)(=O)c1ccc(Cl)s1	40
ENM 482	Pyridinyl thieno-pyrimidines	CCOC(=O)N1CCN(CC1)c1nc(nc2sc(cc12)-c1ccccc1)-c1ccccn1	1.25
ENM 262	3-Aminomethyl-Benzimidazol-2-thiones	CCCn1c2ccc(Cl)cc2n(CN2CCN(CC2)c2ncccn2)c1=S	10
ENM 802	3-Aminomethyl-Benzimidazol-2-thiones	CCCn1c2ccc(Cl)cc2n(CN(C)C2CCS(=O)(=O)C2)c1=S	10
ENM 948	3-Aminomethyl-Benzimidazol-2-thiones	CCCn1c2ccc(Cl)cc2n(CN2CCN(CC2)S(=O)(=O)N(C)C)c1=S	5
ENM 730	3-Aminomethyl-Benzimidazol-2-thiones	Cn1c2ccc(Cl)cc2n(CN2CCC(CC2)C(N)=O)c1=S	10

## Sheet: Table_S3
Name	MIC	Spectral Shift	Second Ring	Hydrophobic Group	Side Chain
GTSM	0.3	Yes
2,2-Dipyridyl	---	Yes
ENM 509	1.25	Yes	2,3 Ring	Yes	Yes
ENM 447	---	No	N/A	Yes	Yes
ENM 792	40	No	2,3 Ring	Yes	Cl
ENM 224	---	No	Benzene Ring	Yes	Yes
ENM 472	---	No	N/A	Yes	Reduced
ENM 482	1.25	Yes	2,2 Ring	Yes	Yes
ENM 208	5	Yes	2,2 Ring	No	NH2
ENM 083	0.6	Yes	2,2 Ring	Yes	Cl
ENM 993	---	No	N/A	No	Yes
ENM 474	---	No	N/A	Yes	Yes
